# Supplementary material for: Clinical and pathological factors of renal anaemia in patients with IgA nephropathy in Chinese adults: a cross-sectional study
Source: PubMed Central journal article supplement — BMJ Open. 2019 Jan 15;9(1):e023479. doi: 10.1136/bmjopen-2018-023479 (PMC6340464; doi:10.1136/bmjopen-2018-023479), 2019-01-15
Supplement: bmjopen-2018-023479supp002.pdf [file bmjopen-2018-023479supp002.pdf]

**Table S1. Possible indications for renal biopsy.**

| <b>indications</b>                                 |
|----------------------------------------------------|
| Microscopic haematuria                             |
| Urologically unexplained macroscopic haematuria    |
| Proteinuria                                        |
| Nephrotic syndrome                                 |
| Impaired kidney function                           |
| Hypertension                                       |
| Possible renal involvement in systemic disease in: |
| multiple myeloma                                   |
| monoclonal gammopathy of uncertain significance    |
| systemic lupus erythematosus                       |
| antiphospholipid syndrome                          |
| diabetes                                           |
| systemic vasculitis                                |
| scleroderma                                        |

**Table S2. Contraindications to renal biopsy**

| <b>Contraindication</b>                                                 | <b>Reason</b>                                                                                                                                                                                                                                                                                                        |
|-------------------------------------------------------------------------|----------------------------------------------------------------------------------------------------------------------------------------------------------------------------------------------------------------------------------------------------------------------------------------------------------------------|
| <b>Relative:</b>                                                        |                                                                                                                                                                                                                                                                                                                      |
| Hypertension                                                            | Poorly controlled hypertension thought to increase risk of bleeding                                                                                                                                                                                                                                                  |
| Renal asymmetry                                                         | Suggestive of a process causing differential loss of renal mass (eg reflux nephropathy, atherosclerotic renal artery stenosis – although both these can cause proteinuria)                                                                                                                                           |
| Decreased renal size (usually assessed as bipolar length on ultrasound) | Suggestive of chronic (therefore irreversible) renal damage, predictive of nonspecific fibrotic changes on biopsy<br>Increased risk of complications reported in most series.                                                                                                                                        |
| Single kidney                                                           | Accepted wisdom, based on the fact that the patient will be put into renal failure if there is irreversible damage to the kidney; however, if the patient appears likely to go into renal failure if left untreated, there is less to lose, and a biopsy may be justified if it might disclose a treatable condition |

|                                              |                                                                                                                                                                                                                                                    |
|----------------------------------------------|----------------------------------------------------------------------------------------------------------------------------------------------------------------------------------------------------------------------------------------------------|
| Unco-operative patient                       | Increased risk of complications if the patient cannot reliably stop breathing during needle puncture.<br>Consider alternatives including biopsy under general anaesthetic, transvenous biopsy                                                      |
| Hydronephrosis                               | Obstructive nephropathy may be the cause of the renal disease (though seldom causes proteinuria) and should be investigated and treated first<br>Increased risk of macroscopic haematuria due to biopsy needle penetrating renal pelvis or calyces |
| Suspected upper urinary tract infection      | Urinary tract infection with white cell casts should be treated with antibiotics<br>Active infection would contraindicate immunosuppressive treatment<br>Biopsy might spread infection or be complicated by perinephric abscess formation          |
| <b>Absolute:</b><br>Uncorrected coagulopathy | If biopsy is imperative, consider transvenous biopsy rather than percutaneous.                                                                                                                                                                     |

---

**Table S3. Comparison of the results of TIBC, Fe and TS of anemic and non-anemic patients with IgA nephropathy**

| Laboratory results         | Anemic<br>n=177 | Non-anemic<br>n=81 | P-value |
|----------------------------|-----------------|--------------------|---------|
| TIBC ( $\mu\text{mol/L}$ ) | 50.4 $\pm$ 8.0  | 45.7 $\pm$ 8.7     | 0.000   |
| Fe ( $\mu\text{mol/L}$ )   | 18.6(14.6-22.8) | 14.3(10.7-17.6)    | 0.000   |
| TS (%)                     | 0.36(0.28-0.46) | 0.33(0.24-0.42)    | 0.093   |
